# Supplementary material for: Large-scale genetic census of an elusive carnivore, the European wildcat (Felis s. silvestris)
Source: Springer Nature journal article supplement (doi:10.1007/s10592-016-0853-2), 2016-05-19
Supplement: MOESM1 [file 10592_2016_853_MOESM1_ESM.docx]

Electronic supplementary material

Steyer, K., Kraus, R.H.S., Mölich, T., Anders, O., Cocchiararo, B., Frosch, C., Geib, A., Götz, M., Herrmann, M., Hupe, K., Kohnen, A., Krüger, M., Müller, F., Pir, J.B., Reiners, T.E., Roch, S., Schade, U., Schiefenhövel, P., Siemund, M., Simon, O., Steeb, S., Streif, S., Streit, B., Thein, J., Tiesmeyer, A., Trinzen, M., Vogel, B. & Nowak, C. (2016) Large-scale genetic census of an elusive carnivore, the European Wildcat (*Felis s. silvestris*)

**Additional tables and figures**

Table S1 {Haplotype accession numbers}

Table S2 {Mammal specific primer results}

Table S3 {Haplotypes vs. microsatellite results}

Table S4 {Detection rate}

Table S5 {Timespan of detections}

Table S6 {Cluster assignment for *K*=2, *K*=3 and *K*=5}

Table S7 {Genetic diversity calculations}

Table S8 {Private allele list}

Table S9 {*FST* cross table}

Table S10 {Wildcat individuals per grid}

Fig. S1 {mtDNA success rate for different amounts of hair}

Fig. S2 {Haplotype frequency for the three different clusters}

Fig. S3 {Map of SNG-HP_FS23 sampling locations}

Fig. S4 {Success rate of microsatellite analysis for different amounts of hair}

Fig. S5 {Consensus sequences of domestic cat and wildcat with fixed differences}

Fig. S6 {FCA and PCA plots}

**Table S1** Haplotype list of this study with accession numbers of each haplotype

| Haplotype1) | phylogenetic set2) | accession numbers3) |
| --- | --- | --- |
| SNG-HP-FS03 | KR076400 | EU313863; GQ268269; GQ268270; GQ268298; GQ268306; GQ268314; GQ268316; JX045658 |
| SNG-HP-FS04 | KR076401 | GQ268315; EU313829; EU313849; GQ268313; EU313830; EU313855; EU313859; GQ268287; GQ268312; GQ268311; GQ268310; GQ268297 |
| SNG-HP-FS05 | KR076402 | EU313833; EU313850 |
| SNG-HP-FS06 | KR076403 | observed for the first time in this study |
| SNG-HP-FS07 | KR076404 | GQ268309 |
| SNG-HP-FS09 | KR076405 | observed for the first time in this study |
| SNG-HP-FS12 | KR076406 | EU313817; EU313870 |
| SNG-HP-FS13 | KR076407 | EU313857; GQ268250; GQ268257; GQ268260; EU313857 |
| SNG-HP-FS15 | KR076408 | observed for the first time in this study |
| SNG-HP-FS16 | KR076409 | GQ268240; GQ268246; GQ268241; GQ268247; GQ268238; GQ268248; EU313867; EU313865; GQ268243; GQ268251; GQ268237; GQ268258; EU313862; EU313854; EU313847; GQ268259; GQ268261; EU313838; EU313837; EU313836; EU313825; EU313824; GQ268263; JX045661; EU313823; GQ268266 |
| SNG-HP-FS21 | KR076410 | observed for the first time in this study |
| SNG-HP-FS22 | KR076411 | GQ268278; GQ268279; GQ268277; GQ268280; GQ268282; GQ268283; GQ268284; GQ268274; GQ268275; GQ268271; GQ268299; GQ268290; GQ268291; GQ268293; GQ268295; GQ268303; GQ268302; GQ268304; GQ268307; GQ268308; GQ268244; GQ268233; JX045660 |
| SNG-HP-FS23 | KR076412 | EU313858; EU313840 |
| SNG-HP-FS24 | KR076413 | EU313846; EU313839; EU313842 |
| SNG-HP-FS26 | KR076414 | EU313861; EU313826; GQ268249; GQ268264; EU313860; |
| SNG-HP-FS31 | KR076415 | EU313822; GQ268256 |
| SNG-HP-FS32 | KR076416 | GQ268239; GQ268236; GQ268235; EU313821; EU313818; GQ268245; GQ268267; GQ268262; GQ268253; GQ268255; GQ268265; EU313845 |
| SNG-HP-FS34 | KR076417 | GQ268254; EU313864; GQ268252 |
| SNG-HP-FS36 | KR076418 | GQ268242; EU313856; EU313871 |
| SNG-HP-FS37 | KR076419 | EU313816; GQ268268; EU313843; U20753_2; U20753; GQ268234 |
| SNG-HP-FS39 | KR076420 | observed for the first time in this study |
| SNG-HP-FS40 | KR076421 | EU313851; EU313831; EU313841 |
| SNG-HP-FS41 | KR076422 | EU313853 |
| SNG-HP-FS47 | KR076423 | EU313872 |
| SNG-HP-FS48 | KR076424 | observed for the first time in this study |
| SNG-HP-FS52 | KR076425 | observed for the first time in this study |
| SNG-HP-FS53 | KR076426 | EU313866 |
| SNG-HP-FS54 | KR076427 | EU313848; EU313834 |
| SNG-HP-FS56 | KR076428 | observed for the first time in this study |
| y1 |  | EU313835 |
| y3 |  | EU313869; EU313868 |
| y4 |  | EU313820; EU313844 |
| y6 |  | EU313852 |

1) Haplotypes with SNG-HP-FSXX were present in our data set while those with number yX were not detected in our study 2) accession numbers from the phylogenetic set obtained in this study, uploaded on GenBank (KR076400-76428) 3) Our haplotypes can have multiple accession numbers because the published sequences are normally longer than the fragment used here (111bp), and thus can differ at positions outside our target fragment

**Table S2** Results of mammal specific primers (CanidC1 and Hcarn200) for 897 lure stick samples that showed no amplification with the *Felis*-specific primers (LF4 and H16498)

|  | **n samples** | **%** |
| --- | --- | --- |
| no amplification | 248 | 27.6 |
| *Vulpes vulpes* | 210 | 23.4 |
| *Sus scrofa* | 142 | 15.8 |
| *Martes spec.* | 95 | 10.6 |
| *Felis spec.* | 80 | 8.9 |
| *Capreolus capreolus* | 55 | 6.1 |
| *Canis spec.* | 32 | 3.6 |
| *Cervus elaphus* | 11 | 1.2 |
| *Lepus europaeus* | 6 | 0.7 |
| *Ovis orientalis* | 4 | 0.4 |
| *Bos taurus* | 3 | 0.3 |
| *Procyon lotor* | 3 | 0.3 |
| *Lama glama* | 2 | 0.2 |
| *Lynx lynx* | 2 | 0.2 |
| *Ovis orientalis aries* | 2 | 0.2 |
| *Oryctolagus cuniculus* | 2 | 0.2 |
| **total** | **897** | **100%** |

**Table S3** Haplotypes found in the dataset with number of samples belonging to haplotype (Nsamples); number of microsatellite based individuals (Nsamples msat) with assignment to the three clusters (dc=domestic cat; wc_central=wildcat belonging to central cluster

| **haplotype** | ***N*samples** | ***N*samples msat** | **dc** | **wc central** | **wc west** | **admixed wc** | **hybrid** |
| --- | --- | --- | --- | --- | --- | --- | --- |
| 3 | 767 | 380 | 2 | 149 | 189 | 28 | 12 |
| 4 | 634 | 335 | 4 | 57 | 248 | 12 | 14 |
| 5 | 111 | 66 | 2 | - | 59 | 4 | 1 |
| 6 | 328 | 160 | - | 144 | 3 | 9 | 4 |
| 7 | 20 | 14 | - | - | 14 | - | - |
| 9 | 3 | 2 | - | 1 | - | 1 | - |
| 12 | 6 | 2 | 1 | - | - | - | 1 |
| 13 | 43 | 10 | 9 | 1 | - | - | - |
| 15 | 8 | 2 | 1 | - | 1 | - | - |
| 16 | 540 | 165 | 146 | - | 1 | 2 | 16 |
| 21 | 2 | 2 | - | - | 1 | 1 | - |
| 22 | 1075 | 487 | 1 | 352 | 98 | 21 | 15 |
| 23 | 47 | 15 | - | 5 | - | 5 | 5 |
| 24 | 1 | 1 | - | - | 1 | -  -  - | - |
| 26 | 43 | 17 | 17 | - | - | - | - |
| 31 | 1 | - | - | - | - | - | - |
| 32 | 107 | 33 | 31 | - | - | - | 2 |
| 34 | 51 | 18 | 18 | - | - | - | - |
| 36 | 35 | 11 | 11 | - | - | - | - |
| 37 | 15 | 7 | 6 | - | - | - | 1 |
| 39 | 3 | 2 | 1 | - | - | - | 1 |
| 40 | 116 | 41 | 2 | - | 33 | 3 | 3 |
| 41 | 3 | 1 | 1 | - | - | - | - |
| 47 | 5 | 2 | 2 | - | - | - | - |
| 48 | 3 | 3 | 3 | - | - | - | - |
| 52 | 5 | 3 | 3 | - | - | - | - |
| 53 | 1 | 1 | 1 | - | - | - | - |
| 54 | 1 | 1 | - | - | 1 | - | - |
| 56 | 8 | 1 | - | - | 1 | - | - |
| **total** | **3982** | **1782** | **262** | **709** | **650** | **86** | **75** |

**Table S4** Origin of samples and detection rate

| **detection rate** | **lure stick** | **lure stick/roadkill** | **roadkill** | **capture** | **total** |
| --- | --- | --- | --- | --- | --- |
| **27** | 1 |  |  |  | **1** |
| **21** | 1 |  |  |  | **1** |
| **17** | 1 |  |  |  | **1** |
| **16** | 1 |  |  |  | **1** |
| **15** | 4 |  |  |  | **4** |
| **14** | 1 |  |  |  | **1** |
| **13** | 1 | 1 |  |  | **2** |
| **12** | 2 |  |  |  | **2** |
| **11** | 1 | 1 |  |  | **2** |
| **10** | 7 |  |  |  | **7** |
| **9** | 2 |  |  |  | **2** |
| **8** | 13 |  |  |  | **13** |
| **7** | 6 |  |  |  | **6** |
| **6** | 18 | 1 |  |  | **19** |
| **5** | 45 |  |  |  | **45** |
| **4** | 55 | 1 |  |  | **56** |
| **3** | 91 | 2 |  |  | **93** |
| **2** | 199 | 3 |  | 1 | **203** |
| **1** | 1009 |  | 627 | 125 | **1761** |
| **total** | **1458** | **9** | **627** | **126** | **2220** |

**Table S5** Timespan between detections in days

| **days** | **lure stick** | **lure stick/roadkill** | **capture** | **total** |
| --- | --- | --- | --- | --- |
| **0-29** | 197 |  |  | 197 |
| **30-59** | 103 | 2 | 1 | 106 |
| **60-89** | 38 |  |  | 38 |
| **90-119** | 13 | 1 |  | 14 |
| **120-149** | 7 |  |  | 7 |
| **150-209** | 1 |  |  | 1 |
| **210-299** |  | 1 |  | 1 |
| **300-329** | 7 |  |  | 7 |
| **330-360** | 11 |  |  | 11 |
| **361-719** | 55 | 3 |  | 58 |
| **720-1079** | 10 |  |  | 10 |
| **1080-1439** | 7 | 2 |  | 9 |
| **1440-1799** | 1 |  |  | 1 |
| **total** | **450** | **9** | **1** | **460** |

**Table S6** Comparison of cluster assignment for *K*=2, *K*=3 and *K*=5; “wc_ admixed”= individuals with *qi*<0.8 to any cluster and *qi*<0.2 to domestic cat cluster; “hybrid”= samples with *qi*>0.2 to domestic cat cluster and *qi*<0.8 to wildcat clusters (potential hybrid)

|  |  | ***K*2** | | | ***K*3** | | | | | |
| --- | --- | --- | --- | --- | --- | --- | --- | --- | --- | --- |
|  |  | **cluster 1 (dc)** | **cluster 2 (wc)** | **not assigned** | **dc** | **wc_west** | **wc_ central** | **wc_ admixed** | **hybrid** | **total** |
| ***K*3** | **domestic cat** | 341 | - | 1 | - | - | - | - | - | **342** |
| **wc_west** | 144 | 186 | 508 | - | - | - | - | - | **838** |
| **wc_central** | - | 850 | 7 | - | - | - | - | - | **857** |
| **wc_admixed** | 2 | 64 | 31 | - | - | - | - | - | **97** |
| **hybrid** | 39 | - | 47 | - | - | - | - | - | **86** |
| **total** | **526** | **1100** | **594** | - | - | - | - | - | **2220** |
| ***K*5** | **domestic cat** | 320 |  |  | 320 |  |  |  |  | **320** |
| **wc_cluster_A** | 158 | 1 | 287 |  | 415 |  | 10 | 21 | **446** |
| **wc_cluster_B** |  | 162 | 123 |  | 280 |  | 5 |  | **285** |
| **wc_A+B adm.** |  | 285 | 1 |  | 118 |  | 1 | 2 | **121** |
| **wc_cluster _C** |  | 312 | 3 |  |  | 284 | 2 |  | **286** |
| **wc_cluster _D** |  | 248 | 4 |  |  | 309 | 6 |  | **315** |
| **wc_C+D adm.** | 8 | 18 | 95 |  |  | 248 | 4 |  | **252** |
| **wc_admixed** | 1 | 74 | 40 |  | 24 | 16 | 69 | 6 | **115** |
| **hybrid** | 39 |  | 41 | 22 | 1 |  |  | 57 | **80** |
| **total** | **526** | **1100** | **594** | **342** | **838** | **857** | **97** | **86** | **2220** |

**Table S7** Genetic diversity with number of alleles (*NA*), observed (*HO*) and expected (*HE*) heterozygosity and departures from Hardy–Weinberg equilibrium (n loci not significant=ns/n loci significantly=* deviating from HWE, p<0.05) and Fixation index (*F*IS) listed for the different *K* runs and clusters obtained in Structure for 2220 individuals. Not assigned individuals with *qi<*0.8 are excluded

| ***n=2220*** | |  | **mean** | **FCA 008** | **FCA 088** | **FCA 124** | **FCA 132** | **FCA 149** | **FCA 170** | **FCA 171** | **FCA 232** | **FCA 275** | **FCA 347** | **FCA 364** | **FCA 567** | **FCA 571** | **FCA 576** |
| --- | --- | --- | --- | --- | --- | --- | --- | --- | --- | --- | --- | --- | --- | --- | --- | --- | --- |
| ***K*2** | **cluster 1 (dc)** | ***NA*** | **12.8** | 16 | 13 | 11 | 17 | 8 | 22 | 12 | 12 | 12 | 12 | 9 | 11 | 13 | 11 |
| ***HO*** | **0.71** | 0.78 | 0.70 | 0.65 | 0.79 | 0.73 | 0.77 | 0.61 | 0.73 | 0.73 | 0.74 | 0.70 | 0.73 | 0.68 | 0.62 |
| ***HE*** | **0.81** | 0.87 | 0.82 | 0.82 | 0.89 | 0.75 | 0.88 | 0.79 | 0.87 | 0.83 | 0.84 | 0.82 | 0.78 | 0.77 | 0.69 |
| n=526 | **HWE** | **(1/13)** | * | * | * | * | ns | * | * | * | * | * | * | * | * | * |
|  | ***F*IS** | **0.13** | 0.10 | 0.14 | 0.21 | 0.12 | 0.03 | 0.13 | 0.22 | 0.16 | 0.12 | 0.12 | 0.15 | 0.05 | 0.12 | 0.10 |
| **cluster 2 (wc)** | ***NA*** | **10.2** | 14 | 9 | 11 | 12 | 5 | 15 | 10 | 10 | 8 | 8 | 7 | 10 | 13 | 11 |
| ***HO*** | **0.58** | 0.68 | 0.40 | 0.51 | 0.72 | 0.51 | 0.73 | 0.52 | 0.59 | 0.60 | 0.58 | 0.53 | 0.67 | 0.63 | 0.53 |
| ***HE*** | **0.66** | 0.78 | 0.46 | 0.63 | 0.79 | 0.56 | 0.82 | 0.61 | 0.64 | 0.66 | 0.63 | 0.59 | 0.74 | 0.76 | 0.60 |
| n=1100 | **HWE** | **(0/14)** | * | * | * | * | * | * | * | * | * | * | * | * | * | * |
|  | ***F*IS** | **0.12** | 0.12 | 0.13 | 0.19 | 0.08 | 0.09 | 0.11 | 0.14 | 0.09 | 0.09 | 0.09 | 0.11 | 0.11 | 0.17 | 0.11 |
| ***K*3** | **domestic cat cluster** | ***NA*** | **12.1** | 15 | 13 | 11 | 17 | 8 | 22 | 9 | 12 | 12 | 12 | 9 | 10 | 9 | 11 |
| ***HO*** | **0.73** | 0.82 | 0.71 | 0.64 | 0.79 | 0.73 | 0.82 | 0.56 | 0.86 | 0.77 | 0.79 | 0.72 | 0.73 | 0.66 | 0.63 |
| ***HE*** | **0.80** | 0.87 | 0.79 | 0.77 | 0.89 | 0.75 | 0.88 | 0.73 | 0.80 | 0.84 | 0.85 | 0.82 | 0.73 | 0.74 | 0.68 |
| n=342 | **HWE** | **(4/10)** | ns | * | * | * | ns | * | * | ns | * | * | * | * | * | ns |
|  | ***F*IS** | **0.10** | 0.05 | 0.10 | 0.17 | 0.11 | 0.02 | 0.07 | 0.23 | 0.08 | 0.09 | 0.08 | 0.13 | 0.01 | 0.12 | 0.07 |
| **wildcat cluster west** | ***NA*** | **11.2** | 16 | 11 | 11 | 14 | 7 | 16 | 10 | 11 | 9 | 12 | 6 | 10 | 13 | 11 |
| ***HO*** | **0.69** | 0.70 | 0.70 | 0.66 | 0.74 | 0.58 | 0.70 | 0.62 | 0.80 | 0.67 | 0.69 | 0.66 | 0.74 | 0.71 | 0.62 |
| ***HE*** | **0.74** | 0.80 | 0.75 | 0.73 | 0.80 | 0.65 | 0.80 | 0.68 | 0.72 | 0.73 | 0.74 | 0.72 | 0.83 | 0.82 | 0.65 |
| n=838 | **HWE** | **(0/14)** | * | * | * | * | * | * | * | * | * | * | * | * | * | * |
|  | ***F*IS** | **0.12** | 0.14 | 0.08 | 0.11 | 0.11 | 0.12 | 0.14 | 0.10 | 0.22 | 0.11 | 0.09 | 0.11 | 0.12 | 0.15 | 0.05 |
| **wildcat cluster central** | ***NA*** | **9.6** | 13 | 8 | 9 | 14 | 5 | 14 | 9 | 12 | 8 | 7 | 7 | 9 | 12 | 8 |
| ***HO*** | **0.61** | 0.71 | 0.38 | 0.51 | 0.75 | 0.53 | 0.75 | 0.55 | 0.76 | 0.59 | 0.60 | 0.54 | 0.70 | 0.67 | 0.54 |
| ***HE*** | **0.64** | 0.78 | 0.41 | 0.54 | 0.76 | 0.55 | 0.80 | 0.58 | 0.70 | 0.61 | 0.62 | 0.58 | 0.73 | 0.70 | 0.58 |
| n=857 | **HWE** | **(5/9)** | * | ns | * | * | ns | * | ns | ns | * | * | * | ns | * | * |
|  | ***F*IS** | **0.08** | 0.11 | 0.11 | 0.07 | 0.04 | 0.06 | 0.08 | 0.08 | 0.06 | 0.06 | 0.09 | 0.12 | 0.08 | 0.08 | 0.10 |
| ***K*4** | **domestic cat cluster** | ***NA*** | **12.0** | 15 | 13 | 11 | 16 | 8 | 22 | 8 | 12 | 12 | 12 | 9 | 10 | 9 | 11 |
| ***HO*** | **0.73** | 0.82 | 0.71 | 0.63 | 0.79 | 0.74 | 0.83 | 0.56 | 0.81 | 0.76 | 0.79 | 0.71 | 0.73 | 0.65 | 0.63 |
| ***HE*** | **0.80** | 0.87 | 0.78 | 0.76 | 0.89 | 0.75 | 0.88 | 0.73 | 0.87 | 0.84 | 0.85 | 0.81 | 0.73 | 0.73 | 0.68 |
| n=327 | **HWE** | **(6/8)** | ns | * | * | * | ns | * | * | ns | * | * | ns | * | ns | ns |
|  | ***F*IS** | **0.09** | 0.05 | 0.09 | 0.17 | 0.11 | 0.02 | 0.06 | 0.23 | 0.07 | 0.10 | 0.07 | 0.12 | -0.01 | 0.12 | 0.07 |
| **wildcat cluster 1 (west)** | ***NA*** | **10.3** | 14 | 10 | 9 | 13 | 6 | 14 | 9 | 11 | 8 | 10 | 6 | 10 | 14 | 10 |
| ***HO*** | **0.68** | 0.70 | 0.74 | 0.68 | 0.76 | 0.66 | 0.70 | 0.70 | 0.56 | 0.64 | 0.65 | 0.65 | 0.77 | 0.73 | 0.62 |
| ***HE*** | **0.74** | 0.80 | 0.78 | 0.75 | 0.82 | 0.70 | 0.76 | 0.71 | 0.72 | 0.68 | 0.69 | 0.70 | 0.84 | 0.80 | 0.66 |
| n=469 | **HWE** | **(4/10)** | * | * | * | ns | ns | ns | * | * | ns | * | * | * | * | * |
|  | ***F*IS** | **0.08** | 0.12 | 0.05 | 0.09 | 0.08 | 0.05 | 0.09 | 0.02 | 0.22 | 0.06 | 0.06 | 0.08 | 0.09 | 0.09 | 0.06 |
| **wildcat cluster 2 (central)** | ***NA*** | **7.70** | 12 | 5 | 7 | 10 | 5 | 12 | 8 | 7 | 5 | 7 | 6 | 6 | 11 | 7 |
| ***HO*** | **0.60** | 0.78 | 0.39 | 0.47 | 0.75 | 0.55 | 0.74 | 0.50 | 0.58 | 0.60 | 0.60 | 0.50 | 0.66 | 0.69 | 0.60 |
| ***HE*** | **0.63** | 0.80 | 0.42 | 0.50 | 0.74 | 0.55 | 0.77 | 0.53 | 0.62 | 0.63 | 0.63 | 0.55 | 0.70 | 0.72 | 0.65 |
| n=453 | **HWE** | **(10/4)** | * | ns | * | ns | ns | * | ns | ns | ns | * | ns | ns | ns | ns |
|  | ***F*IS** | **0.04** | 0.02 | 0.06 | 0.06 | -0.01 | 0.00 | 0.03 | 0.05 | 0.06 | 0.04 | 0.05 | 0.09 | 0.05 | 0.05 | 0.07 |
| **wildcat cluster 31)** | ***NA*** | **-** | - | - | - | - | - | - | - | - | - | - | - | - | - | - |
| ***HO*** | **-** | - | - | - | - | - | - | - | - | - | - | - | - | - | - |
| ***HE*** | **-** | - | - | - | - | - | - | - | - | - | - | - | - | - | - |
| n=2 | **HWE** | **-** | - | - | - | - | - | - | - | - | - | - | - | - | - | - |
|  | ***F*IS** | **-** | - | - | - | - | - | - | - | - | - | - | - | - | - | - |
| ***K5*** | **domestic cat cluster** | ***NA*** | **12.0** | 15 | 13 | 11 | 16 | 8 | 22 | 8 | 12 | 12 | 12 | 9 | 10 | 9 | 11 |
| ***HO*** | **0.72** | 0.82 | 0.71 | 0.63 | 0.78 | 0.74 | 0.83 | 0.55 | 0.81 | 0.77 | 0.79 | 0.71 | 0.73 | 0.65 | 0.63 |
| ***HE*** | **0.80** | 0.86 | 0.79 | 0.76 | 0.88 | 0.75 | 0.88 | 0.73 | 0.87 | 0.85 | 0.85 | 0.81 | 0.72 | 0.73 | 0.67 |
| n=320 | **HWE** | **(6/8)** | ns | * | * | * | ns | * | * | ns | * | * | ns | * | ns | ns |
|  | ***F*IS** | **0.09** | 0.06 | 0.10 | 0.17 | 0.12 | 0.02 | 0.05 | 0.24 | 0.07 | 0.10 | 0.08 | 0.12 | -0.01 | 0.12 | 0.06 |
| **wildcat cluster A** | ***NA*** | **10.2** | 15 | 9 | 9 | 13 | 6 | 14 | 9 | 11 | 7 | 10 | 6 | 10 | 14 | 10 |
| ***HO*** | **0.69** | 0.71 | 0.74 | 0.68 | 0.76 | 0.66 | 0.70 | 0.70 | 0.57 | 0.65 | 0.66 | 0.65 | 0.78 | 0.72 | 0.63 |
| ***HE*** | **0.75** | 0.80 | 0.78 | 0.76 | 0.82 | 0.70 | 0.76 | 0.72 | 0.72 | 0.68 | 0.69 | 0.71 | 0.84 | 0.80 | 0.67 |
| n=446 | **HWE** | **(5/9)** | * | * | * | ns | ns | ns | * | * | ns | * | * | * | * | ns |
|  | ***F*IS** | **0.08** | 0.11 | 0.05 | 0.11 | 0.08 | 0.05 | 0.08 | 0.02 | 0.21 | 0.05 | 0.04 | 0.08 | 0.07 | 0.10 | 0.06 |
| **wildcat cluster B** | ***NA*** | **8.57** | 9 | 8 | 11 | 10 | 5 | 11 | 6 | 8 | 6 | 11 | 5 | 8 | 12 | 10 |
| ***HO*** | **0.61** | 0.70 | 0.61 | 0.59 | 0.67 | 0.47 | 0.65 | 0.51 | 0.49 | 0.69 | 0.67 | 0.62 | 0.68 | 0.58 | 0.62 |
| ***HE*** | **0.69** | 0.76 | 0.68 | 0.66 | 0.75 | 0.56 | 0.71 | 0.57 | 0.60 | 0.78 | 0.74 | 0.64 | 0.75 | 0.79 | 0.66 |
| n=285 | **HWE** | **(8/6)** | ns | * | ns | ns | * | ns | ns | * | * | ns | ns | ns | * | * |
|  | ***F*IS** | **0.11** | 0.08 | 0.10 | 0.11 | 0.11 | 0.16 | 0.09 | 0.11 | 0.18 | 0.12 | 0.09 | 0.04 | 0.09 | 0.27 | 0.06 |
| **wildcat cluster C** | ***NA*** | **7.29** | 9 | 5 | 6 | 11 | 4 | 9 | 8 | 8 | 6 | 5 | 5 | 8 | 11 | 7 |
| ***HO*** | **0.56** | 0.55 | 0.32 | 0.53 | 0.72 | 0.48 | 0.72 | 0.57 | 0.61 | 0.53 | 0.51 | 0.51 | 0.70 | 0.58 | 0.44 |
| ***HE*** | **0.60** | 0.63 | 0.39 | 0.56 | 0.73 | 0.54 | 0.76 | 0.64 | 0.66 | 0.53 | 0.57 | 0.52 | 0.73 | 0.61 | 0.46 |
| n=286 | **HWE** | **(8/6)** | * | ns | ns | * | ns | ns | ns | ns | * | * | ns | ns | * | * |
|  | ***F*IS** | **0.07** | 0.13 | 0.19 | 0.04 | 0.02 | 0.12 | 0.05 | 0.11 | 0.08 | 0.01 | 0.10 | 0.01 | 0.04 | 0.05 | 0.05 |
| **wildcat cluster D** | ***NA*** | **6.93** | 9.00 | 4.00 | 6.00 | 9.00 | 5.00 | 12.00 | 7.00 | 6.00 | 5.00 | 7.00 | 4.00 | 6.00 | 10.00 | 7.00 |
| ***HO*** | **0.60** | 0.75 | 0.44 | 0.49 | 0.76 | 0.57 | 0.70 | 0.45 | 0.57 | 0.62 | 0.63 | 0.51 | 0.64 | 0.71 | 0.61 |
| ***HE*** | **0.63** | 0.79 | 0.44 | 0.52 | 0.73 | 0.55 | 0.76 | 0.48 | 0.62 | 0.63 | 0.65 | 0.54 | 0.69 | 0.75 | 0.66 |
| n=315 | **HWE** | **(11/3)** | * | ns | ns | ns | ns | ns | ns | ns | ns | * | ns | * | ns | ns |
|  | ***F*IS** | **0.04** | 0.05 | 0.01 | 0.06 | -0.03 | -0.04 | 0.07 | 0.06 | 0.08 | 0.02 | 0.03 | 0.07 | 0.07 | 0.06 | 0.08 |

1) Due to low sample size (n=2) no calculations were performed.

**Table S8** List of private alleles for the population assignment by Structure with *K*=2; *K*=3 (domestic cat / wildcat belonging to central cluster= wc_central/ wildcat belonging to western cluster= wc_west/ wc_combined = combination of wc_central and wc_west *versus* domestic cat) and *K*=5 (domestic cat= dc/ wildcat cluster= wc_cluster)

| ***K*=2** |  |  |  |  |  |  |  |  |
| --- | --- | --- | --- | --- | --- | --- | --- | --- |
| **pop** | **locus** | **allele** | **frequency** |  | **pop** | **locus** | **allele** | **frequency** |
| **cluster 1 (dc)** | FCA_008 | 119 | 0.004 |  | **cluster 1 (dc)** | FCA_170 | 135 | 0.001 |
| **cluster 1 (dc)** | FCA_008 | 121 | 0.004 |  | **cluster 1 (dc)** | FCA_171 | 105 | 0.001 |
| **cluster 1 (dc)** | FCA_008 | 143 | 0.014 |  | **cluster 1 (dc)** | FCA_171 | 127 | 0.001 |
| **cluster 1 (dc)** | FCA_088 | 103 | 0.001 |  | **cluster 1 (dc)** | FCA_171 | 129 | 0.001 |
| **cluster 1 (dc)** | FCA_088 | 109 | 0.003 |  | **cluster 1 (dc)** | FCA_232 | 114 | 0.040 |
| **cluster 1 (dc)** | FCA_088 | 127 | 0.070 |  | **cluster 1 (dc)** | FCA_232 | 118 | 0.002 |
| **cluster 1 (dc)** | FCA_088 | 129 | 0.011 |  | **cluster 1 (dc)** | FCA_275 | 120 | 0.020 |
| **cluster 1 (dc)** | FCA_124 | 109 | 0.002 |  | **cluster 1 (dc)** | FCA_275 | 129 | 0.025 |
| **cluster 1 (dc)** | FCA_132 | 138 | 0.050 |  | **cluster 1 (dc)** | FCA_275 | 143 | 0.004 |
| **cluster 1 (dc)** | FCA_132 | 142 | 0.002 |  | **cluster 1 (dc)** | FCA_275 | 145 | 0.019 |
| **cluster 1 (dc)** | FCA_132 | 144 | 0.088 |  | **cluster 1 (dc)** | FCA_347 | 168 | 0.002 |
| **cluster 1 (dc)** | FCA_132 | 166 | 0.002 |  | **cluster 1 (dc)** | FCA_347 | 174 | 0.035 |
| **cluster 1 (dc)** | FCA_132 | 168 | 0.002 |  | **cluster 1 (dc)** | FCA_347 | 176 | 0.017 |
| **cluster 1 (dc)** | FCA_149 | 118 | 0.023 |  | **cluster 1 (dc)** | FCA_347 | 180 | 0.009 |
| **cluster 1 (dc)** | FCA_149 | 122 | 0.006 |  | **cluster 1 (dc)** | FCA_364 | 104 | 0.016 |
| **cluster 1 (dc)** | FCA_149 | 133 | 0.004 |  | **cluster 1 (dc)** | FCA_364 | 114 | 0.010 |
| **cluster 1 (dc)** | FCA_170 | 92 | 0.002 |  | **cluster 1 (dc)** | FCA_567 | 110 | 0.001 |
| **cluster 1 (dc)** | FCA_170 | 95 | 0.004 |  | **cluster 1 (dc)** | FCA_571 | 99 | 0.001 |
| **cluster 1 (dc)** | FCA_170 | 101 | 0.002 |  | **cluster 2 (wc)** | FCA_008 | 111 | 0.001 |
| **cluster 1 (dc)** | FCA_170 | 103 | 0.004 |  | **cluster 2 (wc)** | FCA_124 | 135 | 0.000 |
| **cluster 1 (dc)** | FCA_170 | 120 | 0.059 |  | **cluster 2 (wc)** | FCA_171 | 123 | 0.001 |
| **cluster 1 (dc)** | FCA_170 | 122 | 0.031 |  | **cluster 2 (wc)** | FCA_571 | 122 | 0.000 |
|  |  |  |  |  |  |  |  |  |
| ***K*=3** |  |  |  |  | ***K*=5** |  |  |  |
| **pop** | **locus** | **allele** | **frequency** |  | **pop** | **locus** | **allele** | **frequency** |
| **dc** | FCA_088 | 103 | 0.001 |  | **dc** | FCA_008 | 119 | 0.006 |
| **dc** | FCA_088 | 129 | 0.015 |  | **dc** | FCA_088 | 103 | 0.002 |
| **dc** | FCA_124 | 109 | 0.003 |  | **dc** | FCA_088 | 129 | 0.016 |
| **dc** | FCA_132 | 166 | 0.003 |  | **dc** | FCA_124 | 109 | 0.003 |
| **dc** | FCA_132 | 168 | 0.003 |  | **dc** | FCA_132 | 166 | 0.002 |
| **dc** | FCA_149 | 118 | 0.034 |  | **dc** | FCA_132 | 168 | 0.003 |
| **dc** | FCA_170 | 92 | 0.003 |  | **dc** | FCA_149 | 118 | 0.035 |
| **dc** | FCA_170 | 95 | 0.006 |  | **dc** | FCA_170 | 92 | 0.003 |
| **dc** | FCA_170 | 135 | 0.001 |  | **dc** | FCA_170 | 95 | 0.006 |
| **dc** | FCA_275 | 143 | 0.006 |  | **dc** | FCA_170 | 135 | 0.002 |
| **dc** | FCA_275 | 145 | 0.025 |  | **dc** | FCA_171 | 105 | 0.002 |
| **dc** | FCA_364 | 104 | 0.025 |  | **dc** | FCA_232 | 118 | 0.003 |
| **dc** | FCA_364 | 114 | 0.013 |  | **dc** | FCA_275 | 120 | 0.028 |
| **wc_west** | FCA_171 | 123 | 0.003 |  | **dc** | FCA_275 | 129 | 0.035 |
| **wc_west** | FCA_571 | 122 | 0.001 |  | **dc** | FCA_275 | 143 | 0.007 |
| **wc_west** | FCA_008 | 113 | 0.001 |  | **dc** | FCA_275 | 145 | 0.023 |
| **wc_west** | FCA_571 | 116 | 0.005 |  | **dc** | FCA_364 | 104 | 0.025 |
| **wc_west** | FCA_571 | 120 | 0.049 |  | **dc** | FCA_364 | 114 | 0.011 |
| **wc_west** | FCA_008 | 111 | 0.001 |  | **dc** | FCA_364 | 126 | 0.004 |
| **wc_west** | FCA_124 | 135 | 0.001 |  | **dc** | FCA_567 | 90 | 0.002 |
| **wc_west** | FCA_132 | 132 | 0.001 |  | **wc_cluster A** | FCA_008 | 111 | 0.001 |
| **wc_central** | FCA_171 | 127 | 0.001 |  | **wc_cluster A** | FCA_132 | 132 | 0.001 |
| **wc_central** | FCA_171 | 129 | 0.001 |  | **wc_cluster A** | FCA_171 | 127 | 0.001 |
| **wc_combined** | FCA_567 | 110 | 0.001 |  | **wc_cluster A** | FCA_171 | 129 | 0.002 |
| **wc_combined** | FCA_571 | 99 | 0.002 |  | **wc_cluster A** | FCA_567 | 110 | 0.002 |
| **wc_combined** | FCA_571 | 124 | 0.001 |  | **wc_cluster A** | FCA_571 | 99 | 0.002 |
|  |  |  |  |  | **wc_cluster B** | FCA_124 | 135 | 0.002 |
|  |  |  |  |  | **wc_cluster B** | FCA_132 | 142 | 0.002 |
|  |  |  |  |  | **wc_cluster C** | FCA_171 | 121 | 0.002 |

| ***K*=3** |  |  |  |  | ***K*=5** |  |  |  |
| --- | --- | --- | --- | --- | --- | --- | --- | --- |
| **pop** | **locus** | **allele** | **frequency** |  | **pop** | **locus** | **allele** | **frequency** |
| **dc** | FCA_088 | 103 | 0.001 |  | **dc** | FCA_008 | 119 | 0.006 |
| **dc** | FCA_088 | 129 | 0.015 |  | **dc** | FCA_088 | 103 | 0.002 |
| **dc** | FCA_124 | 109 | 0.003 |  | **dc** | FCA_088 | 129 | 0.016 |
| **dc** | FCA_132 | 166 | 0.003 |  | **dc** | FCA_124 | 109 | 0.003 |
| **dc** | FCA_132 | 168 | 0.003 |  | **dc** | FCA_132 | 166 | 0.002 |
| **dc** | FCA_149 | 118 | 0.034 |  | **dc** | FCA_132 | 168 | 0.003 |
| **dc** | FCA_170 | 92 | 0.003 |  | **dc** | FCA_149 | 118 | 0.035 |
| **dc** | FCA_170 | 95 | 0.006 |  | **dc** | FCA_170 | 92 | 0.003 |
| **dc** | FCA_170 | 135 | 0.001 |  | **dc** | FCA_170 | 95 | 0.006 |
| **dc** | FCA_275 | 143 | 0.006 |  | **dc** | FCA_170 | 135 | 0.002 |
| **dc** | FCA_275 | 145 | 0.025 |  | **dc** | FCA_171 | 105 | 0.002 |
| **dc** | FCA_364 | 104 | 0.025 |  | **dc** | FCA_232 | 118 | 0.003 |
| **dc** | FCA_364 | 114 | 0.013 |  | **dc** | FCA_275 | 120 | 0.028 |
| **wc_west** | FCA_171 | 123 | 0.003 |  | **dc** | FCA_275 | 129 | 0.035 |
| **wc_west** | FCA_571 | 122 | 0.001 |  | **dc** | FCA_275 | 143 | 0.007 |
| **wc_west** | FCA_008 | 113 | 0.001 |  | **dc** | FCA_275 | 145 | 0.023 |
| **wc_west** | FCA_571 | 116 | 0.005 |  | **dc** | FCA_364 | 104 | 0.025 |
| **wc_west** | FCA_571 | 120 | 0.049 |  | **dc** | FCA_364 | 114 | 0.011 |
| **wc_west** | FCA_008 | 111 | 0.001 |  | **dc** | FCA_364 | 126 | 0.004 |
| **wc_west** | FCA_124 | 135 | 0.001 |  | **dc** | FCA_567 | 90 | 0.002 |
| **wc_west** | FCA_132 | 132 | 0.001 |  | **wc_cluster A** | FCA_008 | 111 | 0.001 |
| **wc_central** | FCA_171 | 127 | 0.001 |  | **wc_cluster A** | FCA_132 | 132 | 0.001 |
| **wc_central** | FCA_171 | 129 | 0.001 |  | **wc_cluster A** | FCA_171 | 127 | 0.001 |
| **wc_combined** | FCA_567 | 110 | 0.001 |  | **wc_cluster A** | FCA_171 | 129 | 0.002 |
| **wc_combined** | FCA_571 | 99 | 0.002 |  | **wc_cluster A** | FCA_567 | 110 | 0.002 |
| **wc_combined** | FCA_571 | 124 | 0.001 |  | **wc_cluster A** | FCA_571 | 99 | 0.002 |
|  |  |  |  |  | **wc_cluster B** | FCA_124 | 135 | 0.002 |
|  |  |  |  |  | **wc_cluster B** | FCA_132 | 142 | 0.002 |
|  |  |  |  |  | **wc_cluster C** | FCA_171 | 121 | 0.002 |

**Table S9** *FST* values for the different *K* runs and obtained clusters in Structure (n=2220 individuals). Individuals not assigned to a cluster with *qi≤*0.8 are excluded. All obtained values are highly significant (p<0.001)

|  | | ***K*2** | | ***K*3** | | | ***K*4** | | | | ***K*5** | | | | |
| --- | --- | --- | --- | --- | --- | --- | --- | --- | --- | --- | --- | --- | --- | --- | --- |
| **cluster 1 (dc)** | **cluster 2 (wc)** | **domestic cat** | **wc cluster west** | **wc cluster central** | **domestic cat** | **wc cluster 1 (west)** | **wc cluster 2 (central)** | **wc cluster 3** | **domestic cat** | **wc cluster A** | **wc cluster B** | **wc cluster C** | **wc cluster D** |
| ***K*2** | **cluster 1 (dc)** | - | - |  |  |  |  |  |  |  |  |  |  |  |  |
| **cluster 2 (wc)** | 0.12 | - |  |  |  |  |  |  |  |  |  |  |  |  |
| ***K*3** | **domestic cat** |  |  | - | - | - |  |  |  |  |  |  |  |  |  |
| **wildcat cluster west** |  |  | 0.09 | - | - |  |  |  |  |  |  |  |  |  |
| **wildcat cluster central** |  |  | 0.17 | 0.08 | - |  |  |  |  |  |  |  |  |  |
| ***K*4** | **domestic cat** |  |  |  |  |  | - | - | - | - |  |  |  |  |  |
| **wc cluster 1 (west)** |  |  |  |  |  | 0.09 | - | - | - |  |  |  |  |  |
| **wc cluster 2 (central)** |  |  |  |  |  | 0.18 | 0.09 | - | - |  |  |  |  |  |
| **wc cluster 3**1) |  |  |  |  |  | - | - | - | - |  |  |  |  |  |
| ***K*5** | **domestic cat** |  |  |  |  |  |  |  |  |  | - | - | - | - | - |
| **wc cluster A** |  |  |  |  |  |  |  |  |  | 0.09 | - | - | - | - |
| **wc cluster B** |  |  |  |  |  |  |  |  |  | 0.14 | 0.06 | - | - | - |
| **wc cluster C** |  |  |  |  |  |  |  |  |  | 0.19 | 0.12 | 0.12 | - | - |
| **wc cluster D** |  |  |  |  |  |  |  |  |  | 0.17 | 0.09 | 0.11 | 0.06 | - |

1) Due to low sample size (n=2) no calculations were performed.

**Table S10** Wildcat individuals per grid for the whole study area and for Germany and Luxembourg (note that one grid is located on the border of both countries)

| **individuals per grid** | **total** | **Germany** | **Luxembourg** |
| --- | --- | --- | --- |
| **1** | 175 | 171 | 4 |
| **2** | 81 | 78 | 3 |
| **3** | 47 | 46 | 2 |
| **4** | 30 | 30 |  |
| **5** | 18 | 17 | 1 |
| **6** | 17 | 17 |  |
| **7** | 8 | 7 | 1 |
| **8** | 11 | 10 | 1 |
| **9** | 16 | 16 |  |
| **10** | 11 | 10 | 1 |
| **11** | 7 | 7 |  |
| **12** | 6 | 6 |  |
| **13** | 1 | 1 |  |
| **14** | 5 | 5 |  |
| **15** | 3 | 3 |  |
| **17** | 2 | 2 |  |
| **18** | 1 | 1 |  |
| **20** | 1 | 1 |  |
| **22** | 5 | 4 | 1 |
| **27** | 1 | 1 |  |
| **28** | 1 | 1 |  |
| **32** | 1 | 1 |  |
| **33** | 2 | 2 |  |
| **35** | 1 | 1 |  |
| **39** | 1 | 1 |  |
| **58** | 1 | 1 |  |


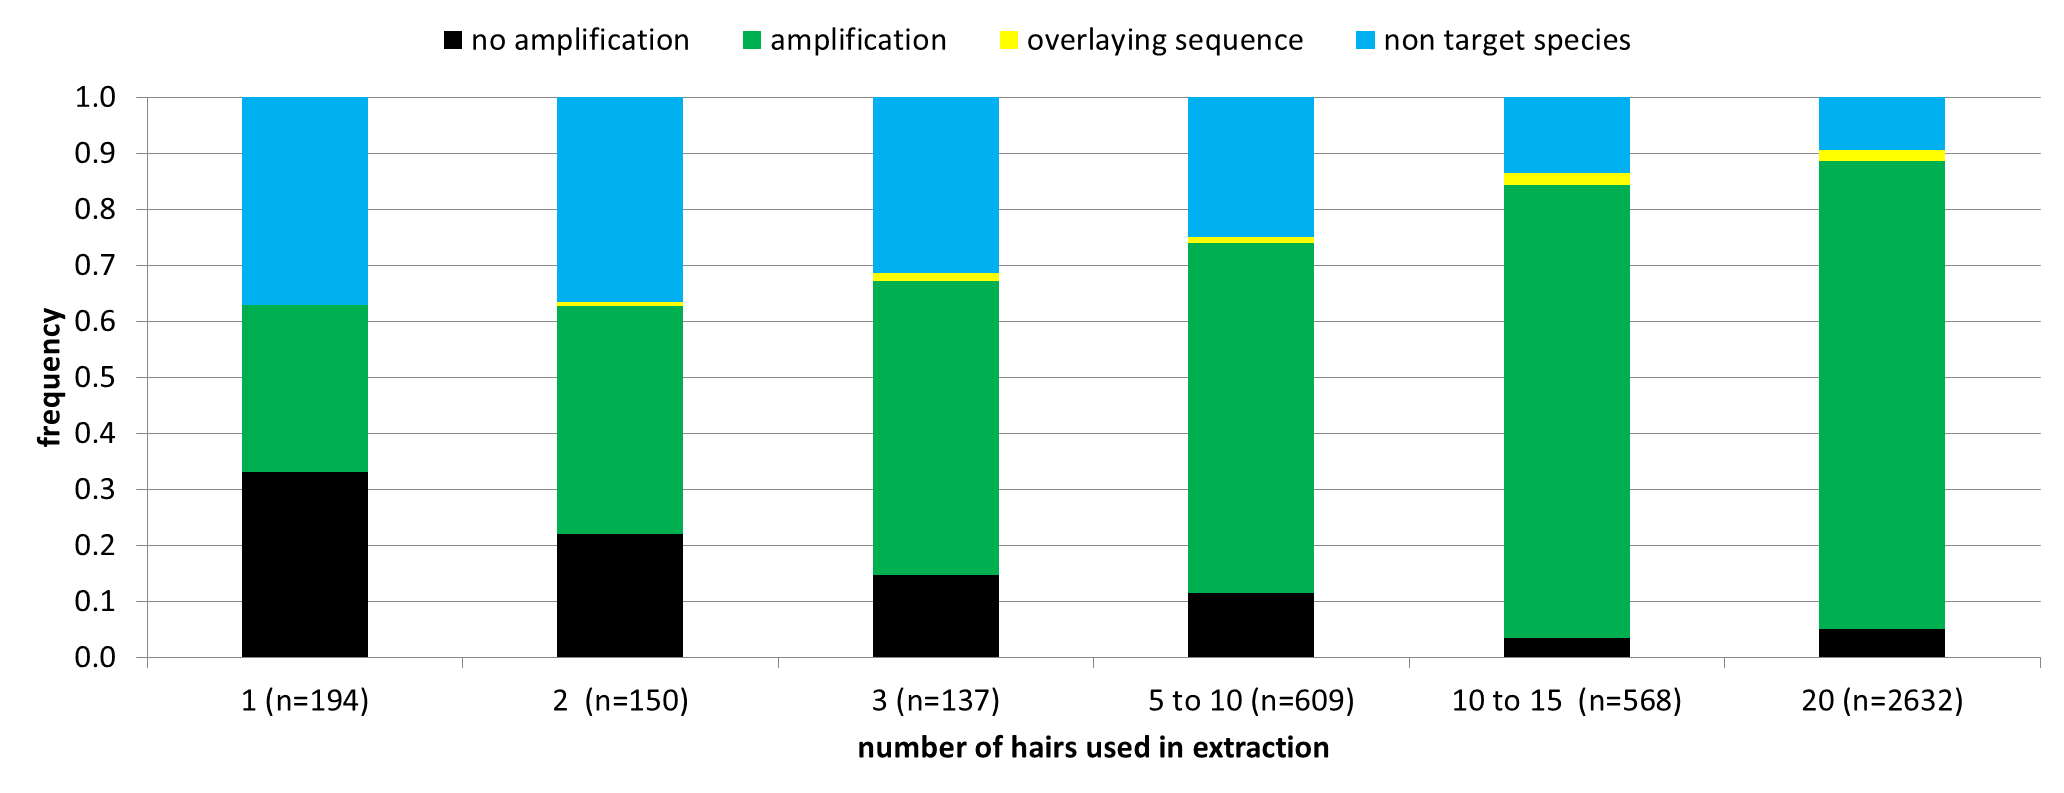


**Fig. S1** Success of mitochondrial DNA analysis using the primers LF4 and H16498 for different amounts of hair collected with lure sticks (n=4290)


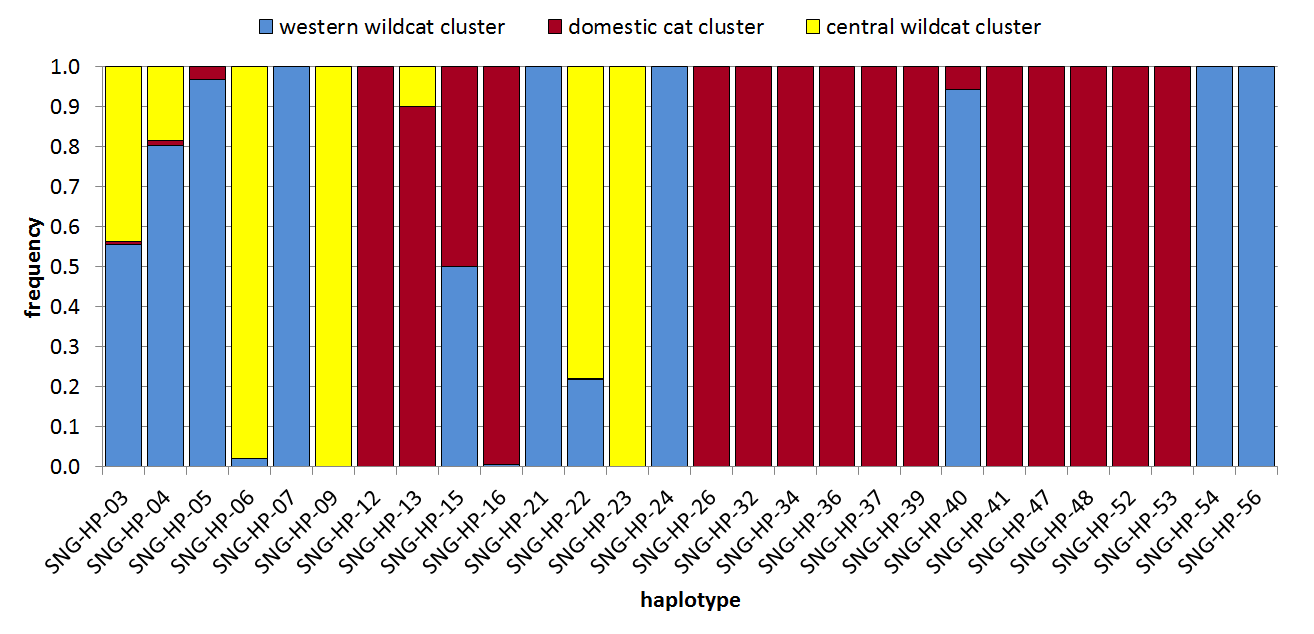


**Fig. S2** Haplotype frequency for the three different clusters obtained with Structure *K*=3(red= domestic cat cluster; yellow= wildcats belonging to central cluster; blue= wildcats belonging to western cluster)


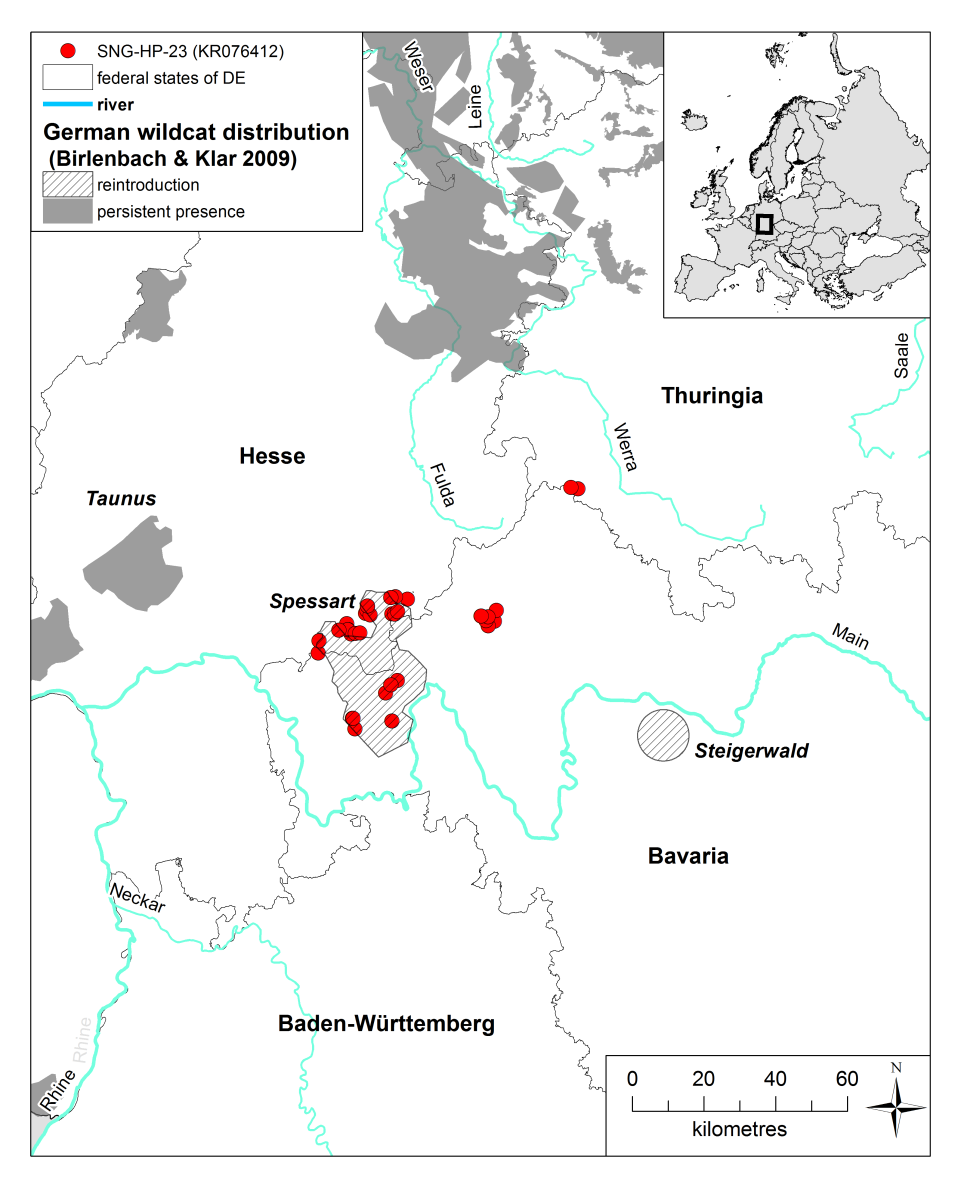


**Fig. S3** Haplotype SNG-HP-FS23 (accession number KR076412) sampling locations


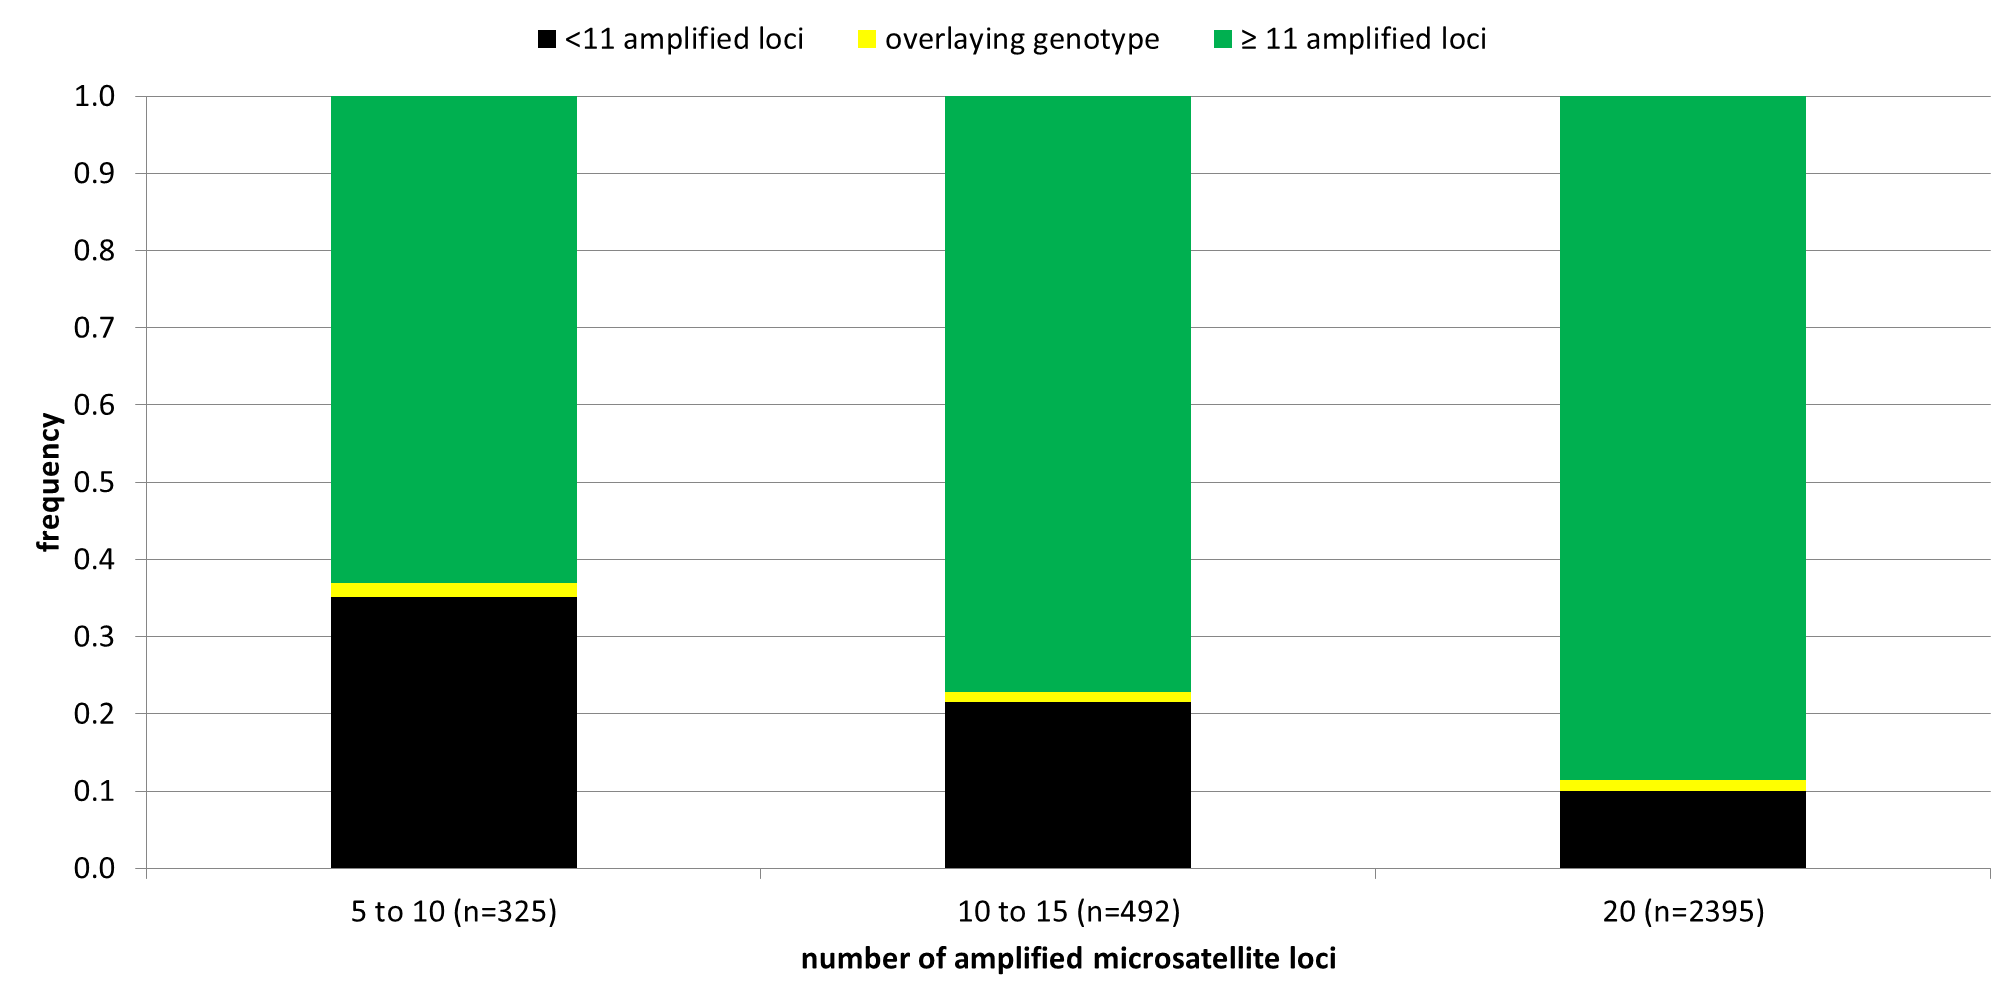


**Fig. S4** Success of microsatellite DNA analysis for different amounts of hair collected with lure sticks (n=3212; black= less than eleven amplified microsatellite loci; red= eleven or more amplified microsatellite loci; green= mixed DNA traces from two or more individuals or cross-contamination in the laboratory process)


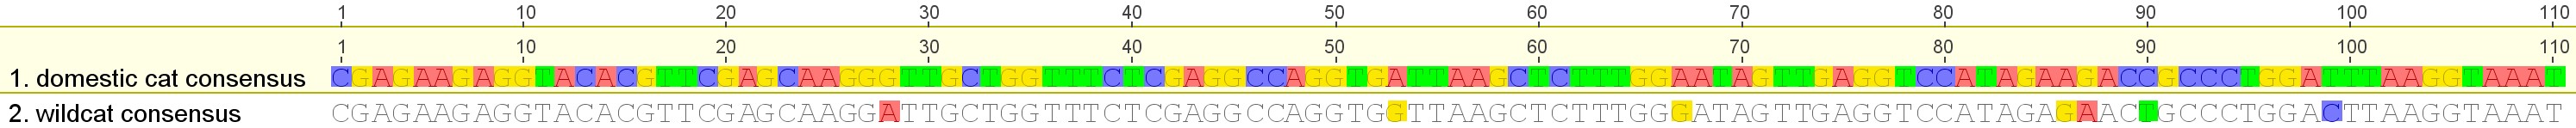


**Fig. S5** Consensus sequences of domestic cat (sequence 1) and wildcat (sequence 2) with fixed differences highlighted in sequence 2. Consensus sequences were obtained by grouping haplotypes from the Structure results using *K*=3 and the full dataset with 2220 individuals. Consensus sequence of domestic cats is based on haplotypes SNG-HP-FS13, -FS16, -FS26, -FS32, -FS34, -FS36, -FS37, -FS41, -FS48, -FS52, and SNG-HP-FS53, for wildcats haplotypes SNG-HP-FS03, -FS04, -FS05, -FS06, -FS07, -FS09, -FS22, -FS40, -FS54 and SNG-HP-FS56


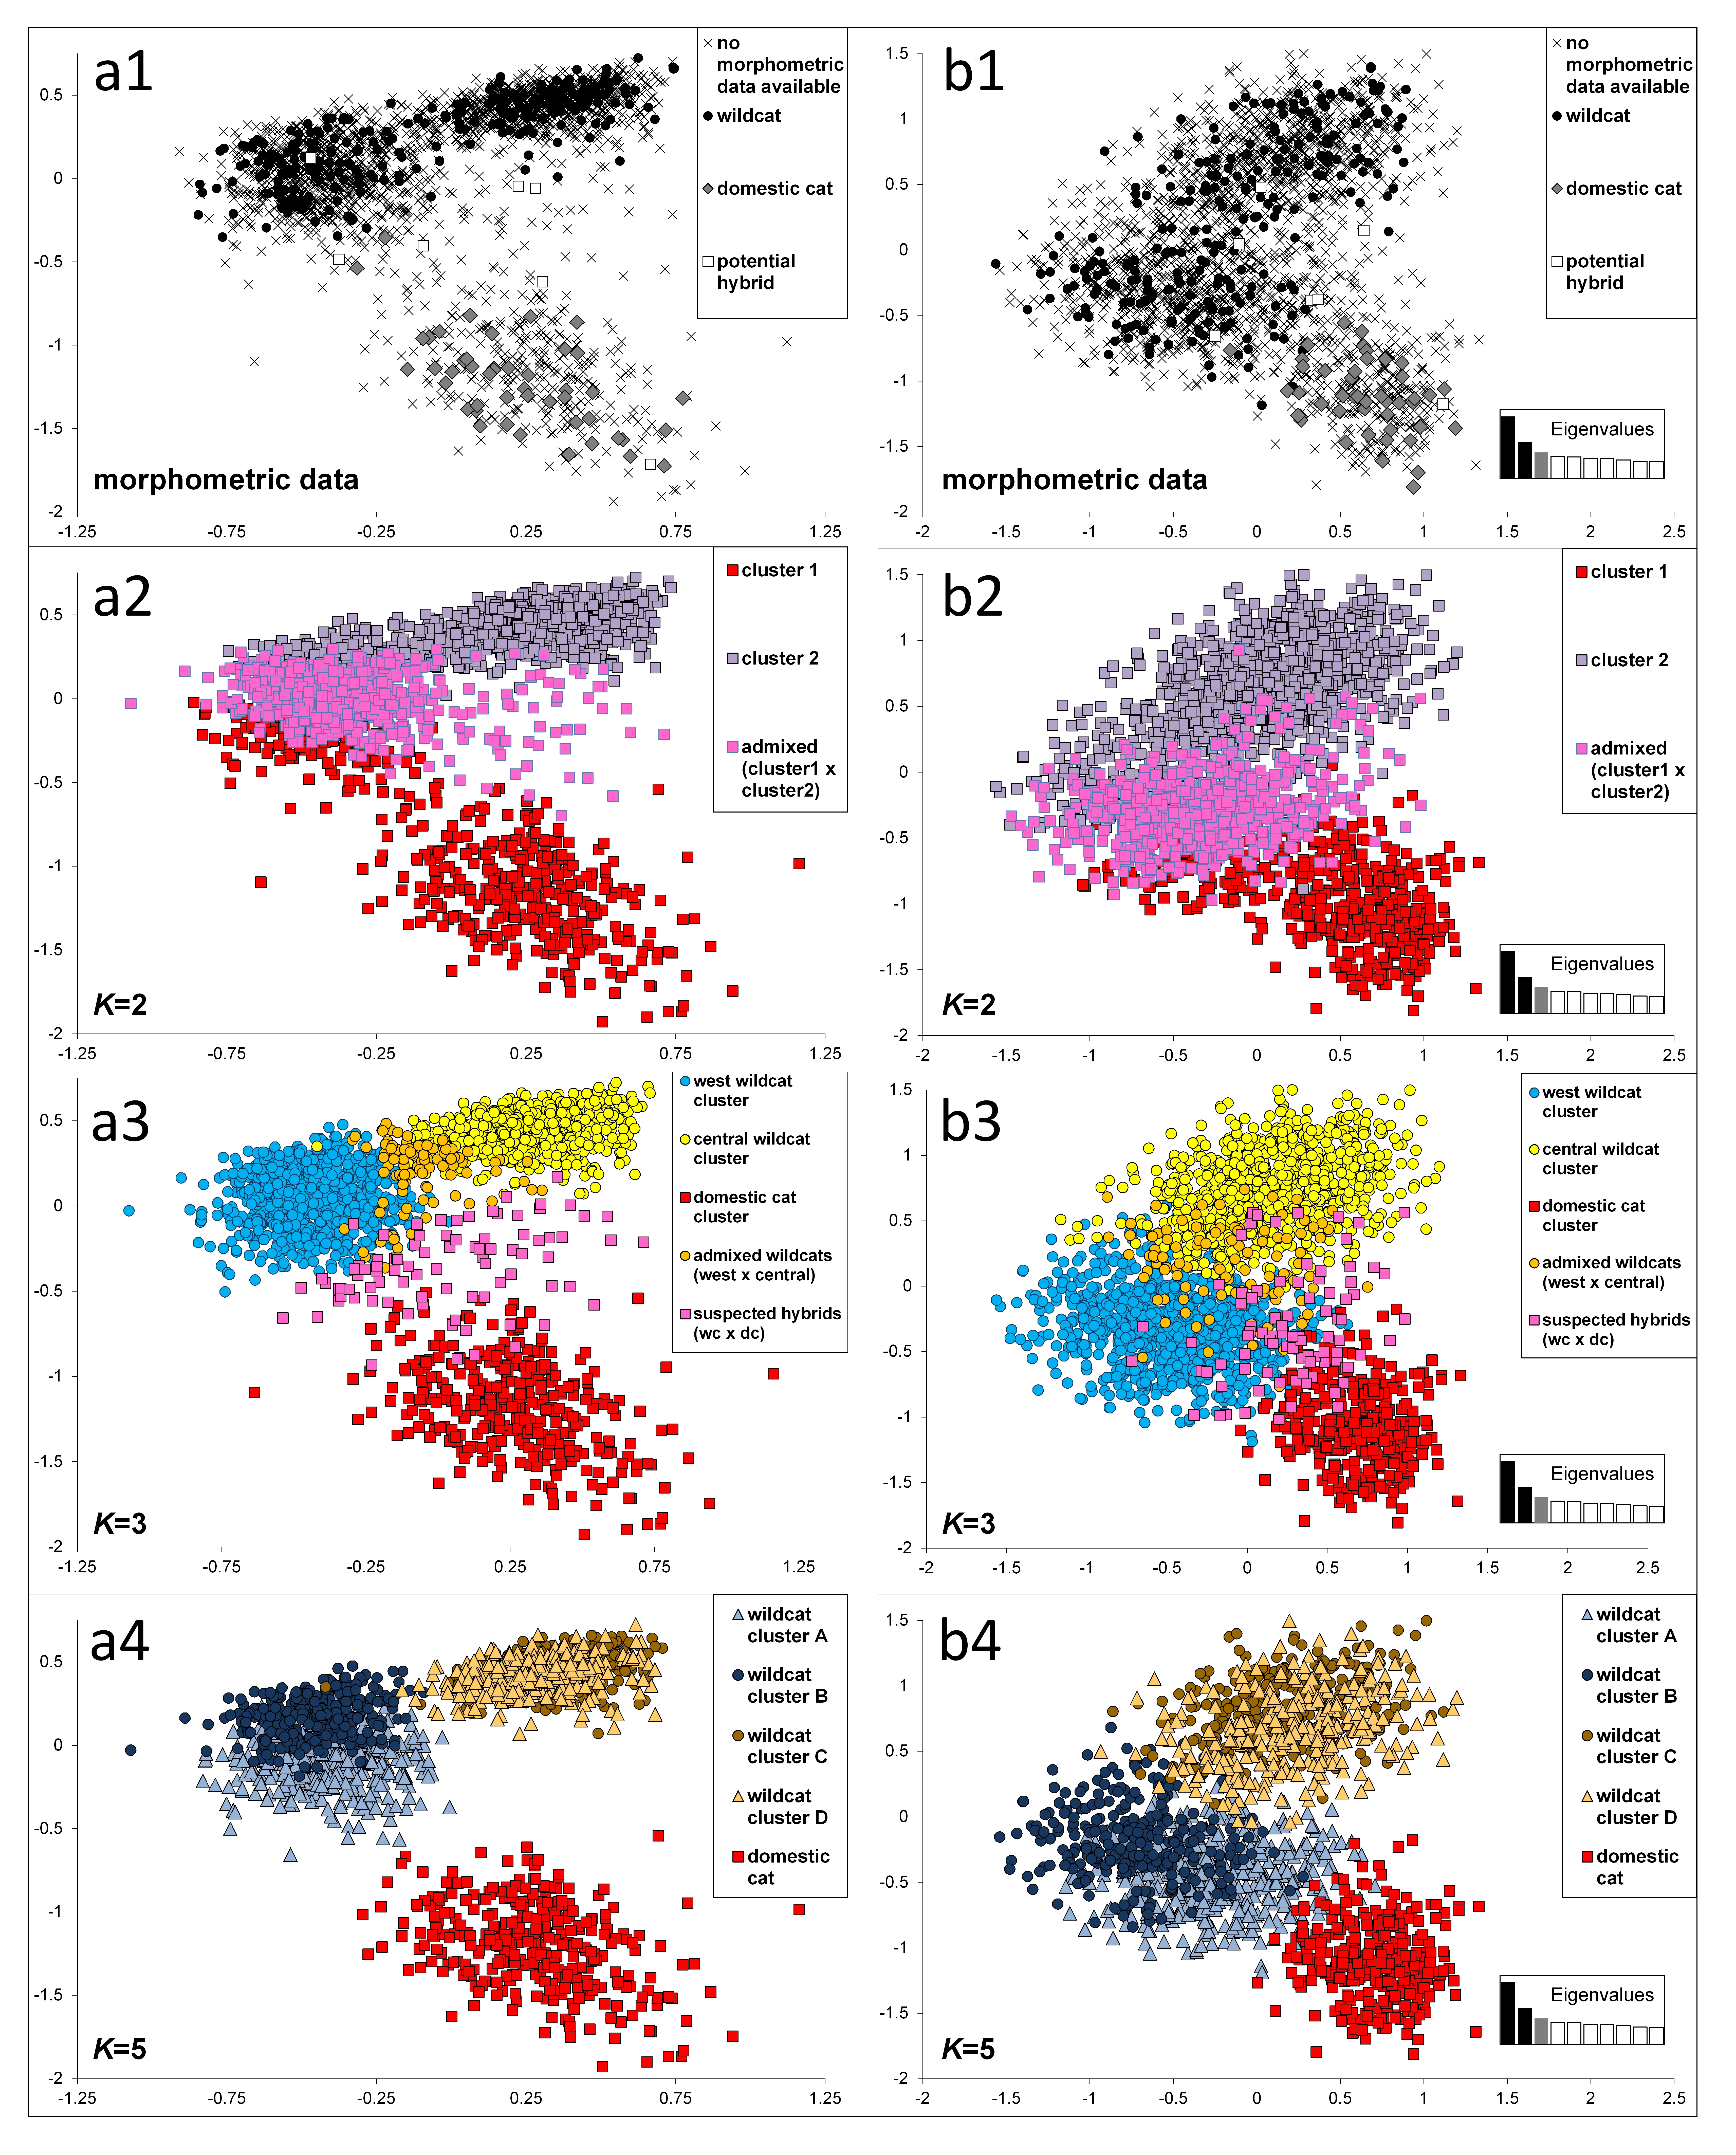


**Fig. S6** Factorial Correspondence Analysis (FCA, a1-a4) and Principal Component Analysis (PCA, b1-b4) showing relationships among multilocus genotypes for the dataset containing 2220 individuals. FCA was calculated using Genetix and two individuals were removed as outliers. The FCA axis I explain 4.6% and axis II 2.22% of the microsatellite variation. PCA was computed using adegenet package in R replacing missing alleles with the mean frequency of the corresponding allele. Distribution of Eigenvalues is shown in the inserted graphs (b1-b4). a1/b1 displays information about morphometric results, whereas a2-4 and b2-B4 shows the substructuring of the dataset based on Structure results for 2220 individuals. Colours correspond to the clusters in Fig. 1. Results for *K*=2 are shown in a2/b2, followed by *K*=3 (a3/b3) and *K*=5 (a4/b4)
